# Supplementary material
Source: PubMed Central journal article supplement (PMC8743301)
Supplement: NIHMS1723607-supplement-1.pdf [file NIHMS1723607-supplement-1.pdf]

Figure S1. Study Schema\*

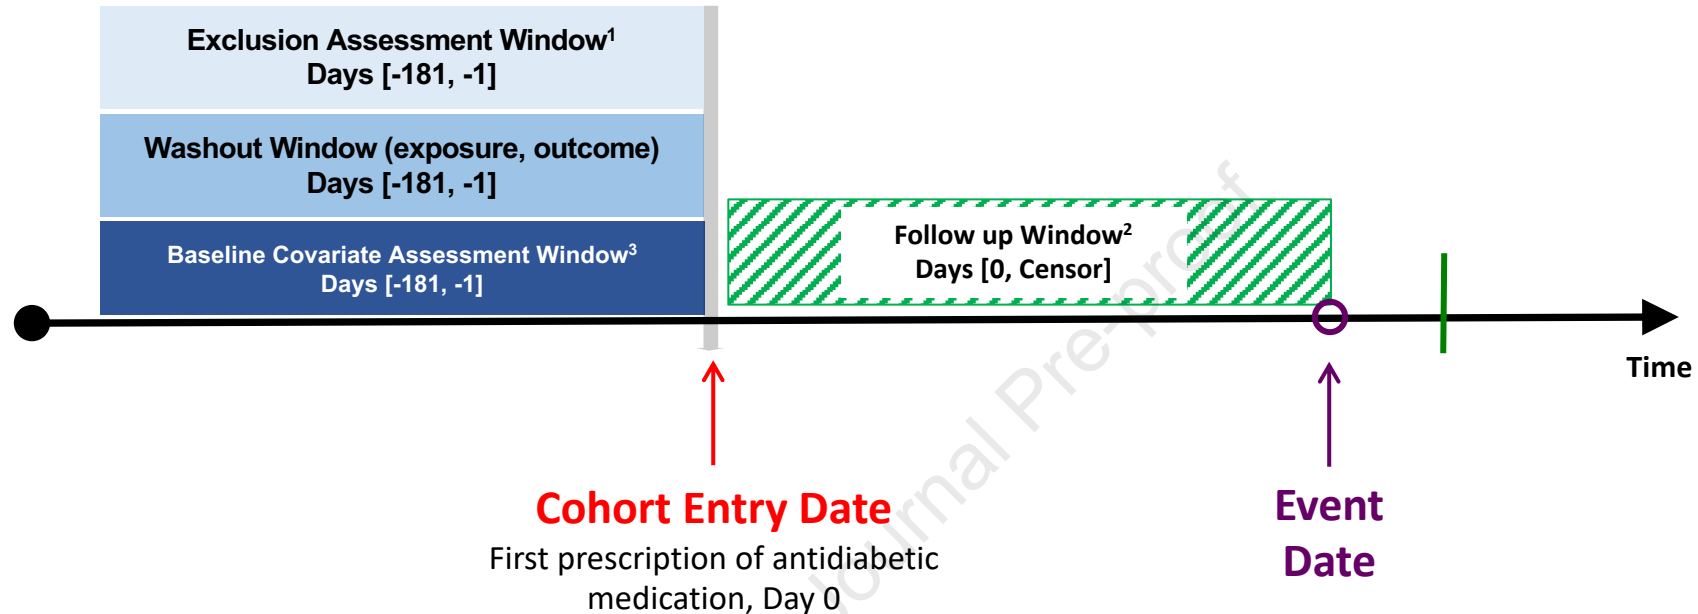

\*The study design was an event-exposure based cohort study. The event was defined by at least 1 diagnosis of a major hepatic decompensation event, defined using validated ICD-9/ICD-10 algorithms, as outlined in Table S1 and the Methods. The exposure was defined by new initiation of a second-line antidiabetic medication (in 3 pairwise comparisons), defined at the cohort entry date. The cohort entry date, in turn, was defined as the date on which the last requirement was fulfilled.

<sup>1</sup>Individuals were excluded with type 1 diabetes, gestational diabetes, end-stage renal failure or human immunodeficiency virus (HIV), as per the Methods. Up to a 45-day grace period was allowed for each medication.

<sup>2</sup>First recorded outcome of interest, switching/stopping study drugs, death, disenrollment or end of study period.

<sup>3</sup>Baseline covariates were defined during the 180-day covariate assessment window, prior to the cohort entry date.

## Supplementary Appendix

### Supplementary Tables:

- **Table S1.** Definitions of Cirrhosis and Hepatic Decompensation Events
- **Table S2A.** Complete Baseline Characteristics in the Unmatched Cohorts of Patients with Cirrhosis and Type 2 Diabetes Initiating GLP-1 Receptor Agonists or Comparator Antidiabetic Medications
- **Table S2B.** Complete Baseline Characteristics in the Propensity Score-Matched Cohorts of Patients with Cirrhosis and Diabetes Initiating GLP-1 Receptor Agonists or Comparator Antidiabetic Medications
- **Table S3.** Risk of Hepatic Decompensation Among Propensity Score-Matched Patients with NAFLD Cirrhosis and Type 2 Diabetes Initiating GLP-1 Receptor Agonists or Comparator Antidiabetic Medications
- **Table S4.** Risk of Hepatic Decompensation in Propensity Score-Matched Subgroups of Patients with Cirrhosis and Type 2 Diabetes Initiating GLP-1 Receptor Agonists or Comparator Antidiabetic Medications
- **Table S5.** Risk of Hepatic Decompensation in Propensity Score-Matched Patients with Strictly Defined Cirrhosis and Type 2 Diabetes Initiating GLP-1 Receptor Agonists or Comparator Antidiabetic Medications
- **Table S6.** Risk of Hepatic Decompensation in Propensity Score-Matched Patients with Cirrhosis and Type 2 Diabetes Initiating GLP-1 Receptor Agonists versus Comparator Antidiabetic Medications, after Decreasing the Exposure Window to 15 days
- **Table S7.** Risk of Hepatic Decompensation in Propensity Score-Matched Patients with Cirrhosis and Type 2 Diabetes Initiating GLP-1 Receptor Agonists or Comparator Antidiabetic Medications, Using an Intention-To-Treat Approach
- **Table S8.** Risk of Hepatic Decompensation in Propensity Score-Matched Patients with Cirrhosis and Type 2 Diabetes Initiating a SGLT-2 inhibitor compared to a DPP-4 inhibitor
- **Table S9.** Risk of Fracture in Propensity Score-Matched Patients with Cirrhosis and Type 2 Diabetes Initiating a GLP-1 Receptor Agonist versus Comparator Antidiabetic Medications
- **Table S10.** Baseline Characteristics in Propensity Score-Matched Patients with Cirrhosis and Type 2 Diabetes Initiating GLP-1 Receptor Agonists or a Comparator Antidiabetic Medication, in the Optum Database
- **Table S11.** Risk of Hepatic Decompensation Events in Propensity Score-Matched Patients with Cirrhosis and Type 2 Diabetes Initiating a GLP-1 Receptor Agonist versus Comparator Antidiabetic Medications, in the Optum Database

### Supplementary Figures:

- **Figure S1.** Study Schema

### Supplementary References

**Table S1.** Definitions of Cirrhosis and Hepatic Decompensation Events

| <b><i>Cirrhosis</i></b>                                                                   | <b><i>Definition</i></b>                                                                                                                                                                                                                                                                                                                                                                                                                                                                                                           |
|-------------------------------------------------------------------------------------------|------------------------------------------------------------------------------------------------------------------------------------------------------------------------------------------------------------------------------------------------------------------------------------------------------------------------------------------------------------------------------------------------------------------------------------------------------------------------------------------------------------------------------------|
| Cirrhosis (any)                                                                           | At least 1 Inpatient or at least 2 Outpatient diagnosis codes:<br>ICD-9: 571.2, 571.5, 571.6<br>ICD-10: K70.3, K74, K74.3, K74.4-K74.6                                                                                                                                                                                                                                                                                                                                                                                             |
| Strict Cirrhosis                                                                          | At least 2 Inpatient or Outpatient codes for cirrhosis                                                                                                                                                                                                                                                                                                                                                                                                                                                                             |
| Compensated Cirrhosis                                                                     | Cirrhosis (defined above), without any prior decompensation event                                                                                                                                                                                                                                                                                                                                                                                                                                                                  |
| Decompensated Cirrhosis                                                                   | Cirrhosis (defined above) plus at least 1 code for a decompensation event, as defined below                                                                                                                                                                                                                                                                                                                                                                                                                                        |
| <b><i>Hepatic decompensation events:</i></b>                                              |                                                                                                                                                                                                                                                                                                                                                                                                                                                                                                                                    |
| Hospitalization for any major hepatic decompensation event                                | Inpatient ICD-9 or ICD-10 discharge diagnosis for at least 1 individual decompensation outcome (defined below):                                                                                                                                                                                                                                                                                                                                                                                                                    |
| <ul style="list-style-type: none"> <li>Ascites</li> </ul>                                 | At least 1 inpatient discharge diagnosis:<br>ICD-9: 789.5, 789.59<br>ICD-10: R18                                                                                                                                                                                                                                                                                                                                                                                                                                                   |
| <ul style="list-style-type: none"> <li>Spontaneous Bacterial Peritonitis (SBP)</li> </ul> | At least 1 inpatient discharge diagnosis:<br>ICD-9: 567.23, 567.0, 567.2, 567.8, 567.9<br>ICD-10: K65.0                                                                                                                                                                                                                                                                                                                                                                                                                            |
| <ul style="list-style-type: none"> <li>Hepatorenal Syndrome (HRS)</li> </ul>              | At least 1 inpatient discharge diagnosis:<br>ICD-9: 572.4<br>ICD-10: K76.7                                                                                                                                                                                                                                                                                                                                                                                                                                                         |
| <ul style="list-style-type: none"> <li>Esophageal Varices with Bleeding</li> </ul>        | At least 1 inpatient discharge diagnosis:<br>ICD-9: 456.0, 456.20<br>ICD-10: I85.0, I98.3                                                                                                                                                                                                                                                                                                                                                                                                                                          |
| <ul style="list-style-type: none"> <li>Hepatic Encephalopathy (HE)</li> </ul>             | At least 1 of the following:<br>(1) Inpatient discharge ICD-9 code for HE: 572.2, OR<br>(2) Inpatient discharge ICD-10 code for cirrhosis (defined above) PLUS a prescription for lactulose and/or rifaximin                                                                                                                                                                                                                                                                                                                       |
| <b><i>Etiology of Cirrhosis:</i></b>                                                      |                                                                                                                                                                                                                                                                                                                                                                                                                                                                                                                                    |
| Nonalcoholic Fatty Liver Disease (NAFLD)                                                  | At least 1 Inpatient or at least 2 Outpatient ICD-9 or ICD-10 diagnosis codes for NAFLD or steatohepatitis (NASH) in a patient with no other recorded etiology of liver disease*:<br>ICD-9: 571.8<br>ICD-10: K76.9, K75.8<br>*See below for other etiologies of liver disease, to be excluded:                                                                                                                                                                                                                                     |
| Alcohol-Related Liver Disease                                                             | At least 1 Inpatient or at least 2 Outpatient ICD-9 or ICD-10 diagnoses:<br>ICD-9: 571.0-571.3<br>ICD-10: K70                                                                                                                                                                                                                                                                                                                                                                                                                      |
| Hepatitis B Virus (HBV) or Hepatitis C Virus (HCV) Infection                              | At least 1 Inpatient or at least 2 Outpatient ICD-9 or ICD-10 diagnoses:<br>ICD-9: 070<br>ICD-10: B16-19                                                                                                                                                                                                                                                                                                                                                                                                                           |
| Other Liver Disease                                                                       | At least 1 Inpatient or at least 2 Outpatient ICD-9 or ICD-10 diagnoses: <ul style="list-style-type: none"> <li>Autoimmune liver disease (AIH, PBC, PSC): 571.6, 576.1; K83.01, K74.3, K75.4</li> <li>Hemochromatosis: 275.0; E83.1</li> <li>Wilson's Disease: 275.1; E83.01</li> <li>Alpha-1-antitrypsin deficiency: 277.6; E88.01</li> <li>Budd-Chiari Syndrome: 453.0; I82.0, K76.5</li> <li>Chronic hepatitis unspecified: 571.4; K73.9, K73.2</li> <li>Secondary/unspecified biliary cirrhosis: 571.6; K74.4-K74.5</li> </ul> |

**Table S2A.** Complete Baseline Characteristics in the Unmatched Cohorts of Patients with Cirrhosis and Type 2 Diabetes Initiating GLP-1 Receptor Agonists or Comparator Antidiabetic Medications

| Baseline Characteristic                 | Cohort 1<br>GLP-1RA vs. DPP-4i |                   | Cohort 2<br>GLP-1RA vs. Sulfonylurea |                         | Cohort 3<br>GLP-1RA vs. SGLT2i |                    |
|-----------------------------------------|--------------------------------|-------------------|--------------------------------------|-------------------------|--------------------------------|--------------------|
|                                         | GLP-1RA<br>N=2,084             | DPP-4i<br>N=4,537 | GLP-1RA<br>N=2,016                   | Sulfonylurea<br>N=8,369 | GLP-1RA<br>N=2,191             | SGLT-2i<br>N=1,225 |
| Male, %                                 | 1,168 (56.0)                   | 2,517 (55.5)      | 1,124 (55.8)                         | 4,858 (58.0)            | 1,218 (55.6)                   | 640 (52.2)         |
| Age, years - mean (SD)                  | 57.3 (8.9)                     | 60.9 (10.4)       | 57.4 (9.0)                           | 61.4 (10.6)             | 57.4 (9.0)                     | 57.8 (8.2)         |
| <u>Etiology of Cirrhosis</u>            |                                |                   |                                      |                         |                                |                    |
| Viral Hepatitis                         | 149 (7.1)                      | 476 (10.5)        | 141 (7.1)                            | 923 (11.0)              | 162 (7.4)                      | 123 (10.0)         |
| Alcoholic Liver Disease                 | 168 (8.1)                      | 675 (14.9)        | 154 (7.6)                            | 1,459 (17.4)            | 173 (7.9)                      | 152 (12.4)         |
| Nonalcoholic fatty liver disease        | 1,349 (64.7)                   | 2,891 (63.7)      | 1,297 (64.3)                         | 5,289 (63.2)            | 1,429 (65.2)                   | 749 (61.1)         |
| Other / Unspecified                     | 418 (20.1)                     | 495 (10.9)        | 424 (21.0)                           | 698 (8.3)               | 427 (19.5)                     | 201 (16.4)         |
| <u>Cirrhosis Severity</u>               |                                |                   |                                      |                         |                                |                    |
| Hospitalization for any decompensation  | 154 (7.4)                      | 709 (15.6)        | 152 (7.5)                            | 1,622 (19.4)            | 163 (7.4)                      | 101 (8.2)          |
| Ascites / SBP                           | 85 (4.1)                       | 533 (11.7)        | 85 (4.2)                             | 1,218 (14.6)            | 92 (4.2)                       | 60 (4.9)           |
| Hepatic encephalopathy                  | 71 (3.4)                       | 316 (7.0)         | 72 (3.6)                             | 596 (7.1)               | 79 (3.6)                       | 54 (4.4)           |
| Esophageal varices (any)                | 71 (3.4)                       | 214 (4.7)         | 67 (3.3)                             | 507 (6.1)               | 71 (3.2)                       | 48 (3.9)           |
| Bleeding esophageal varices             | 22 (1.1)                       | 96 (2.1)          | 20 (1.0)                             | 39 (0.5)                | 23 (1.0)                       | 11 (0.9)           |
| Hepatorenal syndrome                    | 18 (0.4)                       | --                | --                                   | 29 (0.3)                | --                             | --                 |
| Hepatocellular carcinoma                | 50 (2.4)                       | 184 (4.1)         | 48 (2.4)                             | 395 (4.7)               | 50 (2.3)                       | 33 (2.7)           |
| <u>Diabetes Severity</u>                |                                |                   |                                      |                         |                                |                    |
| Nephropathy                             | 66 (3.2)                       | 163 (3.6)         | 66 (3.3)                             | 296 (3.5)               | 71 (3.2)                       | 29 (2.4)           |
| Neuropathy                              | 193 (9.3)                      | 394 (8.7)         | 183 (9.1)                            | 689 (8.2)               | 199 (9.1)                      | 102 (8.3)          |
| Retinopathy                             | 38 (1.8)                       | 93 (2.0)          | 32 (1.6)                             | 129 (1.5)               | 39 (1.8)                       | 11 (0.9)           |
| Circulatory complications               | 39 (1.9)                       | 120 (2.6)         | 34 (1.7)                             | 212 (2.5)               | 42 (1.9)                       | 15 (1.2)           |
| Diabetic foot                           | 30 (1.4)                       | 97 (2.1)          | 31 (1.5)                             | 203 (2.4)               | 33 (1.5)                       | 18 (1.5)           |
| Dorsopathies                            | 327 (15.7)                     | 813 (17.9)        | 308 (15.3)                           | 1,426 (17.3)            | 350 (16.0)                     | 157 (12.8)         |
| Hypoglycemia                            | 51 (2.4)                       | 188 (4.1)         | 49 (2.4)                             | 294 (3.5)               | 55 (2.5)                       | 33 (2.7)           |
| Skin & soft tissue infections           | 127 (6.1)                      | 376 (8.3)         | 125 (6.2)                            | 780 (9.3)               | 135 (6.2)                      | 61 (5.0)           |
| Diabetes without complications          | 1,368 (65.6)                   | 3,680 (81.1)      | 1,313 (65.1)                         | 7,002 (83.7)            | 1,469 (67.0)                   | 660 (53.9)         |
| <u>Diabetes drugs in prior 180 days</u> |                                |                   |                                      |                         |                                |                    |
| Metformin                               | 1,079 (51.8)                   | 1,898 (41.8)      | 1,009 (50.0)                         | 4,017 (48.0)            | 1,121 (51.2)                   | 634 (51.8)         |
| Glitazone                               | 239 (11.5)                     | 436 (9.6)         | 229 (11.4)                           | 613 (7.3)               | 247 (11.3)                     | 68 (5.6)           |
| Insulin                                 | 544 (26.1)                     | 514 (11.3)        | 546 (27.1)                           | 674 (8.1)               | 556 (25.4)                     | 275 (22.4)         |
| SGLT2i                                  | 118 (2.6)                      | 172 (8.3)         | 175 (8.7)                            | 137 (1.6)               | --                             | --                 |
| DPP-4i                                  | --                             | --                | 426 (21.1)                           | 1,045 (12.5)            | 464 (21.2)                     | 346 (28.2)         |
| Sulfonylurea                            | 703 (33.7)                     | 1,665 (36.7)      | --                                   | --                      | 745 (34.0)                     | 418 (34.1)         |
| Meglitinides                            | 19 (0.9)                       | 33 (0.7)          | 20 (1.0)                             | 39 (0.5)                | 19 (0.9)                       | 6 (0.5)            |
| <u>Comorbidities</u>                    |                                |                   |                                      |                         |                                |                    |
| Alcohol abuse / dependence              | 107 (5.1)                      | 559 (12.3)        | 94 (4.7)                             | 1,341 (16.0)            | 110 (5.0)                      | 77 (6.3)           |
| Cancer (any)                            | 139 (6.7)                      | 625 (13.8)        | 132 (6.5)                            | 1,267 (15.1)            | 147 (6.7)                      | 75 (6.1)           |
| Drug abuse / dependence                 | 15 (0.7)                       | 42 (0.9)          | 13 (0.6)                             | 132 (1.6)               | 15 (0.7)                       | 10 (0.8)           |
| Obesity                                 | 327 (15.7)                     | 503 (11.1)        | 321 (15.9)                           | 830 (9.9)               | 349 (15.9)                     | 168 (13.7)         |
| Ever smoker                             | 141 (6.8)                      | 382 (8.4)         | 132 (6.5)                            | 702 (8.4)               | 139 (6.3)                      | 115 (9.4)          |
| Hypertension                            | 862 (41.4)                     | 2,323 (51.2)      | 832 (41.3)                           | 4,288 (51.2)            | 920 (42.0)                     | 468 (38.2)         |
| Dyslipidemia                            | 298 (14.3)                     | 758 (16.7)        | 291 (14.4)                           | 1,280 (15.3)            | 319 (14.6)                     | 137 (11.2)         |
| Ischemic heart disease                  | 191 (9.2)                      | 793 (17.5)        | 184 (9.1)                            | 1,409 (16.8)            | 200 (9.1)                      | 90 (7.3)           |

|                                                 |              |              |              |              |              |            |
|-------------------------------------------------|--------------|--------------|--------------|--------------|--------------|------------|
| Congestive heart failure                        | 102 (4.9)    | 526 (11.6)   | 101 (5.0)    | 1,091 (13.0) | 16 (0.7)     | 17 (1.4)   |
| Cardiac arrhythmia                              | 70 (3.4)     | 363 (8.0)    | 70 (3.5)     | 714 (8.5)    | 74 (3.4)     | 24 (2.0)   |
| Cerebrovascular disease                         | 41 (2.0)     | 262 (5.8)    | 41 (2.0)     | 465 (5.6)    | 41 (1.9)     | 27 (2.2)   |
| Obstructive Sleep Apnea                         | 217 (10.4)   | 349 (7.7)    | 208 (10.3)   | 559 (6.7)    | 229 (10.5)   | 101 (8.2)  |
| Chronic Obstructive Pulmonary disease           | 80 (3.8)     | 383 (8.4)    | 77 (3.8)     | 772 (9.2)    | 84 (3.8)     | 40 (3.3)   |
| Non-diabetes chronic kidney disease             | 89 (4.3)     | 349 (7.7)    | 91 (4.5)     | 630 (7.5)    | 99 (4.5)     | 29 (2.4)   |
| Depression                                      | 181 (8.7)    | 394 (8.7)    | 173 (8.6)    | 816 (9.8)    | 191 (8.7)    | 78 (6.4)   |
| Dementia                                        | 17 (0.8)     | 117 (2.6)    | 16 (0.8)     | 254 (3.0)    | 18 (0.8)     | 4 (0.3)    |
| Hypothyroidism                                  | 208 (10.0)   | 518 (11.4)   | 204 (10.1)   | 801 (9.6)    | 228 (10.4)   | 128 (10.4) |
| Osteoporosis                                    | 76 (3.6)     | 234 (5.2)    | 72 (3.6)     | 367 (4.4)    | 80 (3.7)     | 35 (2.9)   |
| Falls                                           | 41 (2.0)     | 89 (2.0)     | 41 (2.0)     | 177 (2.1)    | 42 (1.9)     | 27 (2.2)   |
| Fractures                                       | 42 (2.0)     | 165 (3.6)    | 69 (3.4)     | 375 (4.5)    | 42 (1.9)     | 28 (2.3)   |
| Frailty <sup>2</sup>                            | 70 (3.3)     | 358 (7.9)    | 69 (3.4)     | 755 (9.0)    | 73 (3.3)     | 36 (2.9)   |
| <i>Medications</i>                              |              |              |              |              |              |            |
| Number of prescription medications, mean (SD)   | 12.0 (5.9)   | 10.6 (5.8)   | 12.0 (5.9)   | 9.5 (5.8)    | 12.0 (5.8)   | 11.6 (5.6) |
| ACE inhibitors                                  | 714 (34.3)   | 1,367 (30.1) | 704 (34.9)   | 2,407 (28.8) | 762 (34.8)   | 407 (33.2) |
| Angiotensin II receptor blockers                | 506 (24.3)   | 826 (18.2)   | 483 (24.0)   | 1,271 (15.2) | 523 (23.9)   | 275 (22.4) |
| Anti-arrhythmic medications                     | 22 (1.1)     | 91 (2.0)     | 21 (1.0)     | 157 (1.9)    | 22 (1.0)     | 11 (0.9)   |
| Anticoagulants                                  | 110 (5.3)    | 314 (6.9)    | 103 (5.1)    | 609 (7.3)    | 108 (4.9)    | 54 (4.4)   |
| Antiplatelets                                   | 120 (5.8)    | 320 (7.1)    | 120 (6.0)    | 500 (6.0)    | 126 (5.8)    | 78 (6.4)   |
| Non-selective beta blockers                     | 594 (28.5)   | 1,375 (30.3) | 568 (28.2)   | 2,436 (29.1) | 614 (28.0)   | 353 (28.8) |
| Bisphosphonates                                 | 40 (1.9)     | 119 (2.6)    | 37 (1.8)     | 199 (2.4)    | 41 (1.9)     | 20 (1.6)   |
| Calcium channel blockers                        | 341 (16.4)   | 803 (17.7)   | 336 (16.7)   | 1,361 (16.3) | 356 (16.2)   | 187 (15.3) |
| Other diuretics                                 | 390 (18.7)   | 658 (14.5)   | 253 (12.5)   | 989 (11.8)   | 367 (16.8)   | 198 (16.2) |
| Loop diuretics                                  | 524 (25.1)   | 1,369 (30.2) | 513 (25.4)   | 2,620 (31.3) | 559 (25.5)   | 282 (23.0) |
| Statins                                         | 859 (41.2)   | 1,463 (32.2) | 832 (41.3)   | 2,329 (27.8) | 893 (40.8)   | 519 (42.4) |
| Non-statin lipid-lowering drugs                 | 298 (14.3)   | 513 (11.3)   | 293 (14.5)   | 798 (9.5)    | 306 (14.0)   | 163 (13.3) |
| Antibiotics (any)                               | 1,104 (53.0) | 2,323 (51.2) | 1,062 (52.7) | 4,098 (49.0) | 1,162 (53.0) | 623 (50.9) |
| Antibiotics - fluoroquinolones                  | 406 (19.5)   | 969 (21.4)   | 396 (19.6)   | 1,750 (20.9) | 429 (19.6)   | 230 (18.8) |
| Anticonvulsants                                 | 390 (18.7)   | 658 (14.5)   | 384 (19.0)   | 1,155 (13.8) | 393 (17.9)   | 234 (19.1) |
| Antidepressants                                 | 799 (38.3)   | 1,277 (28.1) | 780 (38.7)   | 2,256 (27.0) | 841 (38.4)   | 431 (35.2) |
| Benzodiazepines                                 | 374 (17.9)   | 746 (16.5)   | 358 (17.8)   | 1,348 (16.1) | 390 (17.8)   | 211 (17.2) |
| Barbiturates                                    | 62 (3.0)     | 76 (1.7)     | 60 (3.0)     | 108 (1.3)    | 59 (2.7)     | 27 (2.2)   |
| NSAIDs                                          | 366 (17.6)   | 608 (13.4)   | 359 (17.8)   | 981 (11.7)   | 380 (17.3)   | 234 (19.1) |
| Opioids                                         | 885 (42.5)   | 1,930 (42.5) | 861 (42.5)   | 3,479 (41.5) | 926 (42.3)   | 487 (39.8) |
| Rifaximin and/or Lactulose                      | 223 (10.7)   | 648 (14.3)   | 220 (10.9)   | 1,148 (13.7) | 240 (11.0)   | 152 (12.4) |
| <i>Healthcare Utilization in Prior 180 Days</i> |              |              |              |              |              |            |
| Any hospitalization                             | 391 (18.8)   | 1,569 (34.6) | 377 (18.7)   | 3,398 (40.6) | 403 (18.4)   | 224 (18.3) |
| Any ED visit                                    | 654 (31.4)   | 1,823 (40.2) | 614 (30.5)   | 3,587 (42.9) | 671 (30.6)   | 353 (28.8) |
| Any abdominal ultrasound                        | 946 (45.4)   | 2,164 (47.7) | 952 (47.2)   | 4,103 (49.0) | 1,005 (45.9) | 555 (45.3) |
| Any paracentesis                                | 43 (2.1)     | 293 (6.5)    | 41 (2.0)     | 719 (8.6)    | 48 (2.2)     | 29 (2.4)   |
| Any upper endoscopy                             | 620 (29.8)   | 1,351 (29.8) | 594 (29.5)   | 2,425 (29.0) | 643 (29.3)   | 368 (30.0) |
| Any variceal banding                            | 100 (4.8)    | 230 (5.1)    | 98 (4.9)     | 443 (5.3)    | 108 (4.9)    | 69 (5.6)   |
| Any blood transfusion                           | 42 (2.0)     | 229 (5.0)    | 116 (5.8)    | 1,183 (14.1) | 125 (5.7)    | 69 (5.6)   |
| Any visit to endocrinologist                    | 543 (26.1)   | 672 (14.8)   | 530 (26.3)   | 741 (8.9)    | 564 (25.7)   | 306 (25.0) |
| Any visit to gastroenterologist / hepatologist  | 1,166 (56.0) | 2,255 (49.7) | 1,146 (56.8) | 3,909 (46.7) | 1,236 (56.4) | 694 (56.7) |
| Medicare insurance + supplement                 | 355 (17.0)   | 1,422 (31.3) | 341 (16.9)   | 2,802 (33.5) | 384 (17.5)   | 195 (15.9) |

| <i>Preventative Care in Prior 180 Days</i> |              |              |              |              |              |              |
|--------------------------------------------|--------------|--------------|--------------|--------------|--------------|--------------|
| Receipt of pneumonia vaccine               | 236 (11.3)   | 363 (8.0)    | 230 (11.4)   | 545 (6.5)    | 245 (11.2)   | 149 (12.2)   |
| Receipt of flu vaccine                     | 361 (17.3)   | 689 (15.2)   | 362 (18.0)   | 1,183 (14.1) | 386 (17.6)   | 198 (16.2)   |
| Colonoscopy                                | 286 (13.7)   | 640 (14.1)   | 281 (13.9)   | 1,145 (13.7) | 300 (13.7)   | 178 (14.5)   |
| Mammogram                                  | 265 (12.7)   | 463 (10.2)   | 256 (12.7)   | 729 (8.7)    | 278 (12.7)   | 154 (12.6)   |
| PSA or DRE                                 | 212 (10.2)   | 558 (12.3)   | 226 (11.2)   | 966 (11.5)   | 230 (10.5)   | 147 (12.0)   |
| Any visit to primary care provider         | 1,837 (88.1) | 3,950 (87.1) | 1,784 (88.5) | 7,073 (84.5) | 1,931 (88.1) | 1,109 (90.5) |
| HbA1c test ordered                         | 1,599 (76.7) | 2,933 (64.6) | 1,554 (77.1) | 4,734 (56.6) | 1,676 (76.5) | 984 (80.3)   |
| Lipid panel ordered                        | 1,216 (58.3) | 2,230 (49.2) | 1,184 (58.7) | 3,579 (42.8) | 1,270 (58.0) | 766 (62.5)   |
| Liver function tests ordered               | 789 (37.9)   | 1,684 (37.1) | 763 (37.8)   | 2,959 (35.4) | 835 (38.1)   | 422 (34.4)   |
| Microalbuminuria test ordered              | 588 (28.2)   | 927 (20.4)   | 567 (28.1)   | 1,408 (16.8) | 613 (28.0)   | 381 (31.1)   |

Abbreviations: GLP-1RA, glucose-like peptide 1 receptor agonist; DPP-4 inhibitor, dipeptidyl peptidase-4 inhibitor; SGLT-2 inhibitor, sodium-glucose cotransporter-2 inhibitor; SD, standard deviation; SBP, spontaneous bacterial peritonitis; ACE, angiotensin-converting enzyme; ARB, angiotensin II receptor blocker; ED, emergency department; PSA, prostate-specific antigen; DRE, digital rectal examination; HbA1c, hemoglobin A1c).

<sup>1</sup>Hepatic decompensation events included any hospitalization for which primary cause included ascites, spontaneous bacterial peritonitis (SBP), hepatorenal syndrome, hepatic encephalopathy or bleeding esophageal varices. For details see Methods.

<sup>2</sup>Frailty was defined using the validated index by Kim DH et al.<sup>1</sup>

**Table S2B.** Complete Baseline Characteristics in the Propensity Score-Matched Cohorts of Patients with Cirrhosis and Diabetes Initiating GLP-1 Receptor Agonists or Comparator Antidiabetic Medications

| Baseline Characteristic                         | Cohort 1<br>GLP-1RA vs. DPP-4i |                   | Cohort 2<br>GLP-1RA vs. Sulfonylurea |                         | Cohort 3<br>GLP-1RA vs. SGLT2i |                  |
|-------------------------------------------------|--------------------------------|-------------------|--------------------------------------|-------------------------|--------------------------------|------------------|
|                                                 | GLP-1RA<br>N=1,431             | DPP-4i<br>N=1,431 | GLP-1RA<br>N=1,246                   | Sulfonylurea<br>N=1,246 | GLP-1RA<br>N=845               | SGLT-2i<br>N=845 |
| Male, %                                         | 778 (54.2)                     | 785 (54.7)        | 704 (56.5)                           | 693 (55.6)              | 502 (52.0)                     | 498 (51.6)       |
| Age, years - mean (SD)                          | 57.6 (9.1)                     | 57.6 (9.5)        | 57.5 (9.1)                           | 57.6 (9.6)              | 58.0 (8.7)                     | 58.1 (8.4)       |
| <u>Etiology of Cirrhosis</u>                    |                                |                   |                                      |                         |                                |                  |
| Viral Hepatitis                                 | 111 (7.7)                      | 107 (7.5)         | 90 (7.2)                             | 92 (7.4)                | 78 (9.2)                       | 78 (9.2)         |
| Alcoholic Liver Disease                         | 128 (8.9)                      | 125 (8.7)         | 114 (9.2)                            | 127 (10.2)              | 85 (10.1)                      | 94 (11.1)        |
| Nonalcoholic fatty liver disease                | 922 (64.3)                     | 927 (64.6)        | 788 (63.2)                           | 773 (62.0)              | 511 (60.5)                     | 501 (59.3)       |
| Other / Unspecified                             | 274 (19.1)                     | 276 (19.2)        | 255 (20.4)                           | 255 (20.4)              | 171 (20.2)                     | 172 (20.4)       |
| <u>Cirrhosis Severity</u>                       |                                |                   |                                      |                         |                                |                  |
| Prior hepatic decompensation event <sup>1</sup> | 117 (8.2)                      | 115 (8.0)         | 89 (7.1)                             | 97 (7.8)                | 66 (7.8)                       | 63 (7.5)         |
| Ascites / SBP                                   | 68 (4.7)                       | 66 (4.6)          | 56 (4.5)                             | 64 (5.1)                | 42 (5.0)                       | 42 (5.0)         |
| Hepatic encephalopathy                          | 58 (4.0)                       | 60 (4.2)          | 55 (4.4)                             | 54 (4.3)                | 37 (4.4)                       | 33 (3.9)         |
| Esophageal varices (any)                        | 53 (3.7)                       | 46 (3.2)          | 36 (2.9)                             | 36 (2.9)                | 30 (3.6)                       | 27 (3.2)         |
| Bleeding esophageal varices                     | 17 (1.2)                       | 14 (1.0)          | 10 (0.8)                             | 5 (0.4)                 | 7 (0.8)                        | 6 (0.7)          |
| Hepatorenal syndrome                            | --                             | --                | --                                   | --                      | --                             | --               |
| Hepatocellular carcinoma                        | 36 (2.5)                       | 37 (2.6)          | 28 (2.2)                             | 29 (2.3)                | 24 (2.8)                       | 23 (2.7)         |
| <u>Diabetes Severity</u>                        |                                |                   |                                      |                         |                                |                  |
| Nephropathy                                     | 42 (2.9)                       | 45 (3.1)          | 37 (3.0)                             | 35 (2.8)                | 22 (2.6)                       | 22 (2.6)         |
| Neuropathy                                      | 126 (8.8)                      | 128 (8.9)         | 106 (8.5)                            | 108 (8.7)               | 67 (7.9)                       | 70 (8.3)         |
| Retinopathy                                     | 26 (1.8)                       | 26 (1.8)          | 21 (1.7)                             | 17 (1.4)                | 5 (0.6)                        | 7 (0.8)          |
| Circulatory complications                       | 30 (2.1)                       | 24 (1.7)          | 19 (1.5)                             | 19 (1.5)                | 13 (1.5)                       | 11 (1.3)         |
| Diabetic foot                                   | 25 (1.7)                       | 27 (1.9)          | 17 (1.4)                             | 20 (1.6)                | 11 (1.3)                       | 12 (1.4)         |
| Dorsopathies                                    | 240 (16.7)                     | 237 (16.5)        | 195 (15.6)                           | 186 (14.9)              | 102 (12.1)                     | 104 (12.3)       |
| Hypoglycemia                                    | 41 (2.9)                       | 34 (2.4)          | 25 (2.0)                             | 21 (1.7)                | 17 (2.0)                       | 16 (1.9)         |
| Skin & soft tissue infections                   | 97 (6.8)                       | 91 (6.3)          | 74 (5.9)                             | 73 (5.9)                | 35 (4.1)                       | 40 (4.7)         |
| Diabetes without complications                  | 978 (68.2)                     | 971 (67.7)        | 810 (65.0)                           | 797 (63.9)              | 408 (48.3)                     | 407 (48.2)       |
| <u>Diabetes Drugs in Prior 180 Days</u>         |                                |                   |                                      |                         |                                |                  |
| Metformin                                       | 724 (50.5)                     | 724 (50.5)        | 581 (46.6)                           | 605 (48.5)              | 449 (53.1)                     | 453 (53.6)       |
| Glitazone                                       | 150 (10.5)                     | 136 (9.5)         | 114 (9.1)                            | 126 (10.1)              | 45 (5.3)                       | 48 (5.7)         |
| Insulin                                         | 294 (20.5)                     | 300 (20.9)        | 125 (10.0)                           | 139 (11.1)              | 83 (9.8)                       | 77 (9.1)         |
| SGLT2i                                          | 87 (6.1)                       | 86 (6.0)          | 81 (6.5)                             | 85 (6.8)                | --                             | --               |
| DPP-4i                                          | --                             | --                | 76 (6.1)                             | 70 (5.6)                | 201 (23.8)                     | 196 (23.2)       |
| Sulfonylurea                                    | 463 (32.3)                     | 459 (32.0)        | --                                   | --                      | 270 (32.0)                     | 254 (30.1)       |
| Meglitinides                                    | 9 (0.6)                        | 8 (0.6)           | 11 (0.9)                             | 11 (0.9)                | 4 (0.5)                        | 3 (0.4)          |
| <u>Comorbidities</u>                            |                                |                   |                                      |                         |                                |                  |
| Alcohol abuse / dependence                      | 83 (5.8)                       | 82 (5.7)          | 65 (5.2)                             | 59 (4.7)                | 34 (4.0)                       | 32 (3.8)         |
| Cancer (any)                                    | 105 (7.3)                      | 104 (7.2)         | 76 (6.1)                             | 78 (6.3)                | 47 (5.6)                       | 48 (5.7)         |
| Drug abuse / dependence                         | 10 (0.7)                       | 9 (0.6)           | 10 (0.8)                             | 10 (0.8)                | 5 (0.6)                        | 2 (0.2)          |
| Obesity                                         | 219 (15.3)                     | 228 (15.9)        | 200 (16.0)                           | 203 (16.3)              | 120 (14.2)                     | 117 (13.8)       |
| Ever smoker                                     | 98 (6.8)                       | 98 (6.8)          | 75 (6.0)                             | 83 (6.7)                | 73 (8.6)                       | 80 (9.5)         |
| Hypertension                                    | 617 (43.0)                     | 630 (43.9)        | 503 (40.3)                           | 495 (39.7)              | 292 (34.6)                     | 275 (32.5)       |
| Dyslipidemia                                    | 215 (15.0)                     | 215 (15.0)        | 187 (15.0)                           | 180 (14.4)              | 78 (9.2)                       | 76 (9.0)         |
| Ischemic heart disease                          | 144 (10.0)                     | 149 (10.4)        | 104 (8.3)                            | 107 (8.6)               | 67 (7.9)                       | 60 (7.1)         |
| Congestive heart failure                        | 78 (5.4)                       | 77 (5.4)          | 62 (5.0)                             | 60 (4.8)                | 29 (3.4)                       | 25 (3.0)         |



|                                                 |            |            |            |            |             |            |
|-------------------------------------------------|------------|------------|------------|------------|-------------|------------|
| Cardiac arrhythmia                              | 54 (3.8)   | 66 (4.6)   | 37 (3.0)   | 36 (2.9)   | 18 (2.1)    | 18 (2.1)   |
| Cerebrovascular disease                         | 33 (2.3)   | 20 (1.4)   | 26 (2.1)   | 24 (1.9)   | 13 (1.5)    | 11 (1.3)   |
| Obstructive Sleep Apnea                         | 151 (10.5) | 158 (11.0) | 119 (9.5)  | 111 (8.9)  | 77 (9.1)    | 78 (9.2)   |
| Chronic Obstructive Pulmonary disease           | 61 (4.3)   | 66 (4.6)   | 43 (3.4)   | 33 (2.6)   | 26 (3.1)    | 23 (2.7)   |
| Non-diabetes chronic kidney disease             | 62 (4.3)   | 65 (4.5)   | 57 (4.6)   | 50 (4.0)   | 28 (3.3)    | 23 (2.7)   |
| Depression                                      | 125 (8.7)  | 133 (9.3)  | 112 (9.0)  | 106 (8.5)  | 59 (7.0)    | 55 (6.5)   |
| Dementia                                        | 14 (1.0)   | 16 (1.1)   | 13 (1.0)   | 14 (1.1)   | 4 (0.5)     | 4 (0.5)    |
| Hypothyroidism                                  | 143 (10.0) | 150 (10.5) | 132 (10.6) | 121 (9.7)  | 72 (8.5)    | 77 (9.1)   |
| Osteoporosis                                    | 52 (3.6)   | 55 (3.8)   | 51 (4.1)   | 52 (4.2)   | 21 (2.5)    | 24 (2.8)   |
| Falls                                           | 24 (1.7)   | 14 (1.7)   | 22 (1.8)   | 20 (1.6)   | 26 (3.1)    | 21 (2.5)   |
| Fractures                                       | 29 (2.0)   | 29 (2.0)   | 23 (1.8)   | 18 (1.4)   | 14 (1.7)    | 15 (1.8)   |
| Frailty <sup>2</sup>                            | 54 (3.8)   | 48 (3.4)   | 51 (4.1)   | 46 (3.7)   | 27 (3.2)    | 22 (2.6)   |
| <u>Medications</u>                              |            |            |            |            |             |            |
| Number of prescription drugs, mean (SD)         | 11.2 (5.7) | 11.2 (5.9) | 11.2 (5.9) | 11.2 (6.2) | 12.0 (5.9)  | 11.8 (5.6) |
| ACE inhibitors                                  | 475 (33.1) | 466 (32.5) | 380 (30.5) | 405 (32.5) | 285 (33.7)  | 279 (33.0) |
| Angiotensin II receptor blockers                | 321 (22.4) | 345 (24.0) | 275 (22.1) | 265 (21.3) | 200 (23.7)  | 195 (23.1) |
| Anti-arrhythmic medications                     | 16 (1.1)   | 21 (1.5)   | 13 (1.0)   | 19 (1.5)   | 11 (1.3)    | 9 (1.1)    |
| Anticoagulants                                  | 70 (4.9)   | 80 (5.6)   | 58 (4.7)   | 64 (5.1)   | 36 (4.3)    | 34 (4.0)   |
| Antiplatelets                                   | 82 (5.7)   | 75 (5.2)   | 75 (6.0)   | 73 (5.9)   | 52 (6.2)    | 54 (6.4)   |
| Non-selective beta blockers                     | 389 (27.1) | 409 (28.5) | 334 (26.8) | 343 (27.5) | 255 (30.2)  | 244 (28.9) |
| Bisphosphonates                                 | 27 (1.9)   | 27 (1.9)   | 27 (2.2)   | 31 (2.5)   | 12 (1.4)    | 11 (1.3)   |
| Calcium channel blockers                        | 221 (15.4) | 225 (15.7) | 193 (15.5) | 194 (15.6) | 141 (16.7)  | 141 (16.7) |
| Other diuretics                                 | 261 (18.2) | 248 (17.3) | 229 (18.4) | 228 (18.3) | 153 (18.1)  | 144 (17.0) |
| Loop diuretics                                  | 356 (24.8) | 356 (24.8) | 307 (24.6) | 289 (23.2) | 217 (25.7)  | 208 (24.6) |
| Statins                                         | 539 (37.6) | 523 (36.4) | 464 (37.2) | 477 (38.3) | 357 (42.2)  | 362 (42.8) |
| Non-statin lipid-lowering drugs                 | 176 (12.3) | 177 (12.3) | 166 (13.3) | 165 (13.2) | 114 (13.5)  | 104 (12.3) |
| Antibiotics (any)                               | 755 (52.6) | 742 (51.7) | 628 (50.4) | 626 (50.2) | 447 (52.9)  | 432 (51.1) |
| Antibiotics - fluoroquinolones                  | 276 (19.2) | 270 (18.8) | 226 (18.1) | 229 (18.4) | 154 (18.2)  | 160 (18.9) |
| Anticonvulsants                                 | 261 (18.2) | 248 (17.3) | 229 (18.4) | 228 (18.3) | 166 (19.6)  | 163 (19.3) |
| Antidepressants                                 | 514 (35.8) | 514 (35.8) | 468 (37.5) | 460 (36.9) | 311 (36.8)  | 314 (37.2) |
| Benzodiazepines                                 | 245 (17.1) | 241 (16.8) | 221 (17.7) | 209 (16.8) | 154 (18.2)  | 148 (17.4) |
| Barbiturates                                    | 37 (2.6)   | 38 (2.6)   | 34 (2.7)   | 29 (2.3)   | 24 (2.8)    | 21 (2.5)   |
| NSAIDs                                          | 230 (16.0) | 233 (16.2) | 215 (17.2) | 210 (16.8) | 158 (18.7)  | 160 (18.9) |
| Opioids                                         | 608 (42.4) | 582 (40.6) | 519 (41.6) | 492 (39.5) | 343 (40.6)  | 329 (38.9) |
| Rifaximin and/or Lactulose                      | 164 (11.4) | 173 (12.1) | 153 (12.3) | 151 (12.1) | 112 (13.3)  | 103 (12.2) |
| <u>Healthcare Utilization in Prior 180 Days</u> |            |            |            |            |             |            |
| Any hospitalization                             | 300 (20.9) | 289 (20.1) | 225 (18.0) | 231 (18.5) | 155 (18.30) | 143 (16.9) |
| Any ED visit                                    | 460 (32.1) | 474 (33.0) | 366 (29.4) | 384 (30.8) | 267 (31.6)  | 249 (29.5) |
| Any abdominal ultrasound                        | 650 (45.3) | 639 (44.5) | 560 (44.9) | 569 (45.6) | 385 (45.6)  | 393 (46.5) |
| Any paracentesis                                | 33 (2.3)   | 32 (2.2)   | 28 (2.2)   | 36 (2.9)   | 20 (2.4)    | 18 (2.1)   |
| Any upper endoscopy                             | 429 (29.9) | 431 (30.0) | 365 (29.3) | 355 (28.5) | 259 (30.7)  | 263 (31.1) |
| Any variceal banding                            | 74 (5.2)   | 69 (4.8)   | 58 (4.7)   | 65 (5.2)   | 45 (5.3)    | 47 (5.6)   |
| Any blood transfusion                           | 93 (6.5)   | 85 (5.9)   | 66 (5.3)   | 69 (5.5)   | 45 (5.3)    | 46 (5.4)   |
| Any visit to endocrinologist                    | 322 (22.4) | 321 (22.4) | 276 (22.1) | 294 (23.6) | 204 (24.1)  | 201 (23.8) |
| Any visit to gastroenterologist                 | 775 (54.0) | 749 (52.2) | 691 (55.4) | 701 (56.2) | 479 (56.7)  | 486 (57.5) |
| Medicare insurance + supplement                 | 269 (18.8) | 274 (19.1) | 227 (18.2) | 226 (18.1) | 150 (17.8)  | 146 (17.3) |
| <u>Preventative Care in Prior 180 Days</u>      |            |            |            |            |             |            |
| Receipt of pneumonia vaccine                    | 148 (10.3) | 160 (11.1) | 139 (11.1) | 147 (11.8) | 121 (4.3)   | 125 (14.8) |
| Receipt of flu vaccine                          | 238 (16.6) | 256 (17.8) | 225 (18.0) | 235 (18.8) | 147 (17.4)  | 152 (18.0) |



|                                    |              |              |              |              |            |            |
|------------------------------------|--------------|--------------|--------------|--------------|------------|------------|
| Colonoscopy                        | 198 (13.8)   | 193 (13.4)   | 165 (13.2)   | 160 (12.8)   | 120 (14.2) | 132 (15.6) |
| Mammogram                          | 170 (11.8)   | 169 (11.8)   | 170 (13.6)   | 168 (13.5)   | 99 (11.7)  | 103 (12.2) |
| PSA or DRE                         | 149 (10.4)   | 161 (11.2)   | 139 (11.1)   | 157 (12.6)   | 95 (11.2)  | 99 (11.7)  |
| Any visit to primary care provider | 1,260 (87.8) | 1,248 (87.0) | 1,088 (87.2) | 1,088 (87.2) | 766 (90.7) | 771 (91.2) |
| HbA1c test                         | 1,069 (74.5) | 1,075 (74.9) | 925 (74.2)   | 918 (73.6)   | 650 (76.9) | 654 (77.4) |
| Lipid panel                        | 820 (57.1)   | 822 (57.3)   | 707 (56.7)   | 711 (57.0)   | 488 (57.8) | 495 (58.6) |
| Liver function tests               | 541 (37.7)   | 553 (38.5)   | 466 (37.4)   | 492 (39.5)   | 282 (33.4) | 281 (33.3) |
| Microalbuminuria                   | 379 (26.4)   | 385 (26.8)   | 319 (25.6)   | 303 (24.3)   | 250 (29.6) | 253 (29.9) |

Abbreviations: GLP-1RA, glucose-like peptide 1 receptor agonist; DPP-4 inhibitor, dipeptidyl peptidase-4 inhibitor; SGLT-2 inhibitor, sodium-glucose cotransporter-2 inhibitor; SD, standard deviation; SBP, spontaneous bacterial peritonitis; ACE, angiotensin-converting enzyme; ARB, angiotensin II receptor blocker; ED, emergency department; PSA, prostate-specific antigen; DRE, digital rectal examination; HbA1c, hemoglobin A1c).

<sup>1</sup>Hepatic decompensation events included any hospitalization for which primary cause included ascites, spontaneous bacterial peritonitis (SBP), hepatorenal syndrome, hepatic encephalopathy or bleeding esophageal varices. For details see Methods.

<sup>2</sup>Frailty was defined using the validated index by Kim DH et al.<sup>1</sup>

Journal Pre-proof

**Table S3.** Risk of Hepatic Decompensation<sup>1</sup> Among Propensity Score-Matched Patients with NAFLD Cirrhosis\* and Type 2 Diabetes Initiating GLP-1 Receptor Agonists or Comparator Antidiabetic Medications

|                                                  | Cohort 2 (n=920 pairs) |                          | Cohort 2 (n=791 pairs) |                       | Cohort 3 (n=473 pairs) |                           |
|--------------------------------------------------|------------------------|--------------------------|------------------------|-----------------------|------------------------|---------------------------|
|                                                  | GLP-1RA<br>N=920       | DPP-4 Inhibitor<br>N=920 | GLP-1RA<br>N=791       | Sulfonylurea<br>N=791 | GLP-1RA<br>N=473       | SGLT-2 Inhibitor<br>N=473 |
| Mean [IQR] follow-up, days                       | 133 [73, 290]          | 135 [73, 341]            | 132 [73, 258]          | 133 [73, 307]         | 133 [73, 288]          | 152 [73, 360]             |
| <b>Hepatic Decompensation events<sup>1</sup></b> |                        |                          |                        |                       |                        |                           |
| • No. of events                                  | 69                     | 116                      | 60                     | 82                    | 34                     | 37                        |
| • Incidence rate, per 1,000 PY                   | 118.1                  | 176.2                    | 113.4                  | 161.4                 | 104.0                  | 116.9                     |
| • Hazard ratio (95% CI)                          | 0.63 (0.47-0.85)       | 1 (ref.)                 | 0.71 (0.51-0.98)       | 1 (ref.)              | 0.88 (0.55-1.41)       | 1 (ref.)                  |
| <b>Ascites, SBP or Hepatorenal Syndrome</b>      |                        |                          |                        |                       |                        |                           |
| • No. of events                                  | 39                     | 62                       | 32                     | 51                    | 18                     | 16                        |
| • Incidence rate, per 1,000 PY                   | 64.5                   | 88.2                     | 59.2                   | 96.3                  | 57.0                   | 47.2                      |
| • Hazard ratio (95% CI)                          | 0.70 (0.47-1.04)       | 1 (ref.)                 | 0.62 (0.40-0.96)       | 1 (ref.)              | 1.21 (0.62-2.38)       | 1 (ref.)                  |
| <b>Bleed from esophageal varices</b>             |                        |                          |                        |                       |                        |                           |
| • No. of events                                  | 27                     | 61                       | 23                     | 37                    | 15                     | 22                        |
| • Incidence rate, per 1,000 PY                   | 44.6                   | 88.1                     | 42.4                   | 69.9                  | 44.7                   | 61.2                      |
| • Hazard ratio (95% CI)                          | 0.48 (0.31-0.76)       | 1 (ref.)                 | 0.60 (0.36-1.01)       | 1 (ref.)              | 0.72 (0.37-1.42)       | 1 (ref.)                  |
| <b>Hepatic encephalopathy</b>                    |                        |                          |                        |                       |                        |                           |
| • No. of events                                  | 41                     | 69                       | 38                     | 55                    | 15                     | 20                        |
| • Incidence rate, per 1,000 PY                   | 68.7                   | 99.8                     | 72.0                   | 104.4                 | 46.8                   | 59.5                      |
| • Hazard ratio (95% CI)                          | 0.64 (0.43-0.94)       | 1 (ref.)                 | 0.69 (0.46-1.04)       | 1 (ref.)              | 0.79 (0.40-1.54)       | 1 (ref.)                  |

Abbreviations: NAFLD, nonalcoholic fatty liver disease; GLP-1RA, glucose-like peptide 1 receptor agonist; DPP-4 inhibitor, dipeptidyl peptidase-4 inhibitor; SGLT-2 inhibitor, sodium-glucose cotransporter-2 inhibitor; IQR, interquartile range; PY, person-years; CI, confidence interval; SBP, spontaneous bacterial peritonitis

<sup>1</sup>Hepatic decompensation was defined as the first recorded hospitalization for which the primary cause included ascites, spontaneous bacterial peritonitis (SBP), hepatorenal syndrome, bleeding esophageal varices or hepatic encephalopathy. For details see Methods.

\*NAFLD cirrhosis was defined using a validated ICD-based algorithm (see Supplementary Appendix).

**Table S4.** Risk of Hepatic Decompensation<sup>1</sup> in Propensity Score-Matched Subgroups of Patients with Cirrhosis and Type 2 Diabetes Initiating GLP-1 Receptor Agonists or Comparator Antidiabetic Medications

| Subgroup*:                               | Cohort 1         |             | Cohort 2         |              |
|------------------------------------------|------------------|-------------|------------------|--------------|
|                                          | GLP-1RA          | DPP-4i      | GLP-1RA          | Sulfonylurea |
| <b>Men</b>                               |                  |             |                  |              |
| • No. of events / No. of subjects        | 75 / 760         | 103 / 760   | 46 / 811         | 82 / 811     |
| • Hazard ratio (95% CI)                  | 0.81 (0.60-1.04) | 1 (ref.)    | 0.67 (0.47-0.97) | 1 (ref.)     |
| <b>Women</b>                             |                  |             |                  |              |
| • No. of events / No. of subjects        | 45 / 975         | 71 / 975    | 50 / 999         | 86 / 999     |
| • Hazard ratio (95% CI)                  | 0.66 (0.45-0.96) | 1 (ref.)    | 0.64 (0.45-0.91) | 1 (ref.)     |
| <b>HBV/HCV Cirrhosis</b>                 |                  |             |                  |              |
| • No. of events / No. of subjects        | 9 / 131          | 22 / 131    | 5 / 132          | 17 / 132     |
| • Hazard ratio (95% CI)                  | 0.40 (0.19-0.88) | 1 (ref.)    | 0.30 (0.11-0.81) | 1 (ref.)     |
| <b>Alcohol-Related Cirrhosis</b>         |                  |             |                  |              |
| • No. of events / No. of subjects        | 31 / 160         | 35 / 160    | 26 / 156         | 33 / 156     |
| • Hazard ratio (95% CI)                  | 0.98 (0.67-1.79) | 1 (ref.)    | 0.77 (0.46-1.29) | 1 (ref.)     |
| <b>Commercial Insurance</b>              |                  |             |                  |              |
| • No. of events / No. of subjects        | 79 / 1,236       | 114 / 1,236 | 47 / 940         | 78 / 940     |
| • Hazard ratio (95% CI)                  | 0.73 (0.57-0.93) | 1 (ref.)    | 0.60 (0.40-0.89) | 1 (ref.)     |
| <b>Metformin use</b>                     |                  |             |                  |              |
| • No. of events / No. of subjects        | 59 / 1,067       | 89 / 1,067  | 49 / 1,161       | 98 / 1,161   |
| • Hazard ratio (95% CI)                  | 0.73 (0.53-1.02) | 1 (ref.)    | 0.62 (0.44-0.87) | 1 (ref.)     |
| <b>No Metformin use</b>                  |                  |             |                  |              |
| • No. of events / No. of subjects        | 66 / 753         | 106 / 753   | 44 / 799         | 68 / 799     |
| • Hazard ratio (95% CI)                  | 0.69 (0.54-0.94) | 1 (ref.)    | 0.69 (0.47-1.01) | 1 (ref.)     |
| <b>Non-selective Beta-Blocker use</b>    |                  |             |                  |              |
| • No. of events / No. of subjects        | 48 / 437         | 77 / 437    | 32 / 446         | 67 / 446     |
| • Hazard ratio (95% CI)                  | 0.69 (0.48-0.99) | 1 (ref.)    | 0.54 (0.35-0.82) | 1 (ref.)     |
| <b>No Non-selective Beta-Blocker use</b> |                  |             |                  |              |
| • No. of events / No. of subjects        | 76 / 1,332       | 104 / 1,332 | 58 / 1,425       | 97 / 1,425   |
| • Hazard ratio (95% CI)                  | 0.82 (0.61-1.10) | 1 (ref.)    | 0.70 (0.50-0.97) | 1 (ref.)     |

Abbreviations: GLP-1RA, glucose-like peptide 1 receptor agonist; DPP-4 inhibitor, dipeptidyl peptidase-4 inhibitor; IQR, CI, confidence interval; HBV, hepatitis B virus infection; HCV, hepatitis C virus infection

<sup>1</sup>Hepatic decompensation was defined as the first recorded hospitalization for which the primary cause included ascites, spontaneous bacterial peritonitis (SBP), hepatorenal syndrome, bleeding esophageal varices or hepatic encephalopathy. For details see Methods.

\*For each subgroup, the propensity score (PS) was recalculated and the PS-matching procedure was repeated, to ensure appropriate balance between groups. For that reason, the numbers of patients in each PS-matched subgroup differ from the numbers of patients with and without specific characteristics, in Table 1.

Journal Pre-proof

**Table S5.** Risk of Hepatic Decompensation in Propensity Score-Matched Patients with Strictly Defined Cirrhosis\* and Type 2 Diabetes Initiating GLP-1 Receptor Agonists or Comparator Antidiabetic Medications

|                                            | Cohort 1 (n=1,147 pairs) |                            | Cohort 2 (n=989 pairs) |                       | Cohort 3 (n=700 pairs) |                           |
|--------------------------------------------|--------------------------|----------------------------|------------------------|-----------------------|------------------------|---------------------------|
|                                            | GLP-1RA<br>N=1,147       | DPP-4 inhibitor<br>N=1,147 | GLP-1RA<br>N=989       | Sulfonylurea<br>N=989 | GLP-1RA<br>N=700       | SGLT-2 inhibitor<br>N=700 |
| Mean [IQR] follow-up, days                 | 133 [73, 280]            | 141 [73, 352]              | 127 [71, 248]          | 133 [73, 280]         | 133 [73, 286]          | 144 [73, 342]             |
| Hepatic Decompensation events <sup>1</sup> |                          |                            |                        |                       |                        |                           |
| • No. of events                            | 86                       | 136                        | 72                     | 103                   | 44                     | 61                        |
| • Incidence rate, per 1,000 PY             | 120.1                    | 165.7                      | 115.0                  | 161.3                 | 98.7                   | 132.7                     |
| • Hazard ratio (95% CI)                    | 0.69 (0.53-0.91)         | 1 (ref.)                   | 0.70 (0.52, 0.94)      | 1 (ref.)              | 0.74 (0.50-1.10)       | 1 (ref.)                  |
| Ascites, SBP or hepatorenal syndrome       |                          |                            |                        |                       |                        |                           |
| • No. of events                            | 41                       | 69                         | 44                     | 66                    | 31                     | 37                        |
| • Incidence rate, per 1,000 PY             | 47.8                     | 71.6                       | 69.0                   | 100.6                 | 69.0                   | 84.1                      |
| • Hazard ratio (95% CI)                    | 0.72 (0.51-0.99)         | 1 (ref.)                   | 0.67 (0.46-0.98)       | 1 (ref.)              | 0.81 (0.50-1.29)       | 1 (ref.)                  |
| Bleed from esophageal varices              |                          |                            |                        |                       |                        |                           |
| • No. of events                            | 34                       | 62                         | 24                     | 39                    | 21                     | 33                        |
| • Incidence rate, per 1,000 PY             | 44.0                     | 70.4                       | 31.7                   | 48.2                  | 46.2                   | 69.5                      |
| • Hazard ratio (95% CI)                    | 0.61 (0.40-0.93)         | 1 (ref.)                   | 0.64 (0.39-1.07)       | 1 (ref.)              | 0.67 (0.38-1.15)       | 1 (ref.)                  |
| Hepatic encephalopathy                     |                          |                            |                        |                       |                        |                           |
| • No. of events                            | 58                       | 79                         | 46                     | 76                    | 31                     | 30                        |
| • Incidence rate, per 1,000 PY             | 80.1                     | 93.3                       | 58.4                   | 88.4                  | 68.9                   | 63.0                      |
| • Hazard ratio (95% CI)                    | 0.80 (0.57-1.13)         | 1 (ref.)                   | 0.64 (0.45-0.93)       | 1 (ref.)              | 1.07 (0.65-1.77)       | 1 (ref.)                  |

Abbreviations: GLP-1RA, glucose-like peptide 1 receptor agonist; DPP-4 inhibitor, dipeptidyl peptidase-4 inhibitor; SGLT-2 inhibitor, sodium-glucose cotransporter-2 inhibitor; IQR, interquartile range; PY, person-years; CI, confidence interval; SBP, spontaneous bacterial peritonitis

\*For this analysis, a diagnosis of cirrhosis required >2 inpatient or outpatient ICD-9 or ICD-10 diagnosis codes for cirrhosis, during the 180-day period prior to cohort entry.

For details see Methods and the Supplementary Appendix.

<sup>1</sup>Hepatic decompensation was defined as the first recorded hospitalization for which the primary cause included ascites, spontaneous bacterial peritonitis (SBP), hepatorenal syndrome, hepatic encephalopathy or bleeding esophageal varices. For details see Methods.

**Table S6.** Risk of Hepatic Decompensation in Propensity Score-Matched Patients with Cirrhosis and Type 2 Diabetes Initiating GLP-1 Receptor Agonists versus Comparator Antidiabetic Medications, after Decreasing the Exposure Window to 15 days

|                                            | Cohort 1 (n=1,431 pairs) |                            | Cohort 2 (n=1,246 pairs) |                         | Cohort 3 (n=845 pairs) |                           |
|--------------------------------------------|--------------------------|----------------------------|--------------------------|-------------------------|------------------------|---------------------------|
|                                            | GLP-1RA<br>N=1,431       | DPP-4 Inhibitor<br>N=1,431 | GLP-1RA<br>N=1,246       | Sulfonylurea<br>N=1,246 | GLP-1RA<br>N=845       | SGLT-2 Inhibitor<br>N=845 |
| Mean [IQR] follow-up, days                 | 83 [43, 158]             | 103 [43, 200]              | 74 [43, 143]             | 99 [43, 183]            | 86 [43, 165]           | 103 [43, 224]             |
| Hepatic Decompensation events <sup>1</sup> |                          |                            |                          |                         |                        |                           |
| • No. of events                            | 62                       | 106                        | 40                       | 97                      | 38                     | 47                        |
| • Incidence rate, per 1,000 PY             | 119.7                    | 151.7                      | 86.4                     | 180.5                   | 114.3                  | 121.9                     |
| • Hazard ratio (95% CI)                    | 0.70 (0.51-0.96)         | 1 (ref.)                   | 0.46 (0.32-0.66)         | 1 (ref.)                | 0.89 (0.58-1.36)       | 1 (ref.)                  |
| Ascites, SBP or hepatorenal syndrome       |                          |                            |                          |                         |                        |                           |
| • No. of events                            | 42                       | 57                         | 26                       | 59                      | 27                     | 31                        |
| • Incidence rate, per 1,000 PY             | 80.6                     | 79.8                       | 56.0                     | 106.4                   | 81.4                   | 78.4                      |
| • Hazard ratio (95% CI)                    | 0.91 (0.61-1.36)         | 1 (ref.)                   | 0.51 (0.32-0.81)         | 1 (ref.)                | 0.99 (0.59-1.66)       | 1 (ref.)                  |
| Bleed from esophageal varices              |                          |                            |                          |                         |                        |                           |
| • No. of events                            | 23                       | 49                         | 9                        | 36                      | 17                     | 25                        |
| • Incidence rate, per 1,000 PY             | 43.7                     | 68.6                       | 19.1                     | 64.7                    | 50.6                   | 63.6                      |
| • Hazard ratio (95% CI)                    | 0.58 (0.35-0.95)         | 1 (ref.)                   | 0.29 (0.14-0.60)         | 1 (ref.)                | 0.75 (0.41-1.39)       | 1 (ref.)                  |
| Hepatic encephalopathy                     |                          |                            |                          |                         |                        |                           |
| • No. of events                            | 42                       | 58                         | 37                       | 56                      | 24                     | 25                        |
| • Incidence rate, per 1,000 PY             | 80.8                     | 81.8                       | 80.5                     | 100.7                   | 72.1                   | 64.0                      |
| • Hazard ratio (95% CI)                    | 0.87 (0.58-1.30)         | 1 (ref.)                   | 0.74 (0.49-1.12)         | 1 (ref.)                | 1.04 (0.59-1.82)       | 1 (ref.)                  |

Abbreviations: GLP-1RA, glucose-like peptide 1 receptor agonist; DPP-4 inhibitor, dipeptidyl peptidase-4 inhibitor; SGLT-2 inhibitor, sodium-glucose cotransporter-2 inhibitor; IQR, interquartile range; PY, person-years; CI, confidence interval; SBP, spontaneous bacterial peritonitis

<sup>1</sup>Hepatic decompensation was defined as the first recorded hospitalization for which the primary cause included ascites, spontaneous bacterial peritonitis (SBP), hepatorenal syndrome, hepatic encephalopathy or bleeding esophageal varices. For details see Methods.

**Table S7.** Risk of Hepatic Decompensation in Propensity Score-Matched Patients with Cirrhosis and Type 2 Diabetes Initiating GLP-1 Receptor Agonists or Comparator Antidiabetic Medications, Using an Intention-To-Treat Approach<sup>2</sup>

|                                            | Cohort 1 (n=1,431 pairs) |                            | Cohort 2 (n=1,246 pairs) |                         | Cohort 3 (n=845 pairs) |                           |
|--------------------------------------------|--------------------------|----------------------------|--------------------------|-------------------------|------------------------|---------------------------|
|                                            | GLP-1RA<br>N=1,431       | DPP-4 Inhibitor<br>N=1,431 | GLP-1RA<br>N=1,246       | Sulfonylurea<br>N=1,246 | GLP-1RA<br>N=845       | SGLT-2 Inhibitor<br>N=845 |
| Mean [IQR] follow-up, days                 | 364 [163, 364]           | 364 [148, 364]             | 364 [169, 364]           | 364 [130, 364]          | 364 [165, 364]         | 364 [162, 364]            |
| Hepatic Decompensation events <sup>1</sup> |                          |                            |                          |                         |                        |                           |
| • No. of events                            | 125                      | 165                        | 106                      | 154                     | 62                     | 64                        |
| • Incidence rate, per 1,000 PY             | 116.4                    | 155.2                      | 111.8                    | 174.4                   | 101.2                  | 103.3                     |
| • Hazard ratio (95% CI)                    | 0.73 (0.57-0.94)         | 1 (ref.)                   | 0.66 (0.51-0.86)         | 1 (ref.)                | 0.97 (0.67-1.39)       | 1 (ref.)                  |
| Ascites, SBP or hepatorenal syndrome       |                          |                            |                          |                         |                        |                           |
| • No. of events                            | 65                       | 108                        | 62                       | 106                     | 41                     | 39                        |
| • Incidence rate, per 1,000 PY             | 58.9                     | 98.5                       | 64.1                     | 116.5                   | 65.4                   | 61.8                      |
| • Hazard ratio (95% CI)                    | 0.58 (0.42-0.80)         | 1 (ref.)                   | 0.56 (0.41-0.78)         | 1 (ref.)                | 1.05 (0.67-1.65)       | 1 (ref.)                  |
| Bleed from esophageal varices              |                          |                            |                          |                         |                        |                           |
| • No. of events                            | 46                       | 78                         | 39                       | 66                      | 29                     | 35                        |
| • Incidence rate, per 1,000 PY             | 41.3                     | 70.5                       | 39.8                     | 71.3                    | 46.1                   | 55.5                      |
| • Hazard ratio (95% CI)                    | 0.58 (0.40-0.84)         | 1 (ref.)                   | 0.58 (0.39-0.87)         | 1 (ref.)                | 0.82 (0.50-1.36)       | 1 (ref.)                  |
| Hepatic encephalopathy                     |                          |                            |                          |                         |                        |                           |
| • No. of events                            | 56                       | 66                         | 50                       | 66                      | 27                     | 27                        |
| • Incidence rate, per 1,000 PY             | 50.7                     | 59.7                       | 51.5                     | 71.3                    | 42.8                   | 42.6                      |
| • Hazard ratio (95% CI)                    | 0.84 (0.59-1.21)         | 1 (ref.)                   | 0.75 (0.51-1.09)         | 1 (ref.)                | 1.00 (0.58-1.72)       | 1 (ref.)                  |

Abbreviations: GLP-1RA, glucose-like peptide 1 receptor agonist; DPP-4 inhibitor, dipeptidyl peptidase-4 inhibitor; SGLT-2 inhibitor, sodium-glucose cotransporter-2 inhibitor; IQR, interquartile range; PY, person-years; CI, confidence interval; SBP, spontaneous bacterial peritonitis

<sup>1</sup>Hepatic decompensation was defined as the first recorded hospitalization for which the primary cause included ascites, spontaneous bacterial peritonitis (SBP), hepatorenal syndrome, hepatic encephalopathy or bleeding esophageal varices. For details see Methods.

<sup>2</sup>To mimic an intention-to-treat approach, the exposure to an initiated drug was carried forward for 365 days without censoring for drug discontinuation or switching, as described in the Methods.



**Table S8.** Risk of Hepatic Decompensation in Propensity Score-Matched Patients with Cirrhosis and Type 2 Diabetes Initiating a SGLT-2 inhibitor compared to a DPP-4 inhibitor

|                                                  | <b>PS-Matched Cohort (n=723 pairs)</b> |                                  |
|--------------------------------------------------|----------------------------------------|----------------------------------|
|                                                  | <b>SGLT-2 Inhibitor<br/>N=723</b>      | <b>DPP-4 Inhibitor<br/>N=723</b> |
| Mean [IQR] follow-up, days                       | 135 [73, 331]                          | 133 [73, 276]                    |
| <b>Hepatic Decompensation events<sup>1</sup></b> |                                        |                                  |
| • No. of events                                  | 60                                     | 64                               |
| • Incidence rate, per 1,000 PY                   | 111.8                                  | 133.8                            |
| • Hazard ratio (95% CI)                          | 0.89 (0.62-1.26)                       | 1 (ref.)                         |
| <b>Ascites, SBP or hepatorenal syndrome</b>      |                                        |                                  |
| • No. of events                                  | 33                                     | 52                               |
| • Incidence rate, per 1,000 PY                   | 59.5                                   | 108.5                            |
| • Hazard ratio (95% CI)                          | 0.58 (0.38-0.90)                       | 1 (ref.)                         |
| <b>Bleed from esophageal varices</b>             |                                        |                                  |
| • No. of events                                  | 17                                     | 19                               |
| • Incidence rate, per 1,000 PY                   | 34.9                                   | 44.2                             |
| • Hazard ratio (95% CI)                          | 0.81 (0.42-1.55)                       | 1 (ref.)                         |
| <b>Hepatic encephalopathy</b>                    |                                        |                                  |
| • No. of events                                  | 32                                     | 35                               |
| • Incidence rate, per 1,000 PY                   | 58.6                                   | 72.1                             |
| • Hazard ratio (95% CI)                          | 0.87 (0.54-1.41)                       | 1 (ref.)                         |

Abbreviations: SGLT-2 inhibitor, sodium-glucose cotransporter-2 inhibitor; DPP-4 inhibitor, dipeptidyl peptidase-4 inhibitor; IQR, interquartile range; PY, person-years; CI, confidence interval; SBP, spontaneous bacterial peritonitis

<sup>1</sup>Hepatic decompensation was defined as the first recorded hospitalization for which the primary cause included ascites, spontaneous bacterial peritonitis (SBP), hepatorenal syndrome, hepatic encephalopathy or bleeding esophageal varices.

**Table S9.** Risk of Fracture in Propensity Score-Matched Patients with Cirrhosis and Type 2 Diabetes Initiating a GLP-1 Receptor Agonist versus Comparator Antidiabetic Medications

|                                | Cohort 1 (n=1,431 pairs) |                            | Cohort 2 (n=1,246 pairs) |                         | Cohort 3 (n=845 pairs) |                           |
|--------------------------------|--------------------------|----------------------------|--------------------------|-------------------------|------------------------|---------------------------|
|                                | GLP-1RA<br>N=1,431       | DPP-4 Inhibitor<br>N=1,431 | GLP-1RA<br>N=1,246       | Sulfonylurea<br>N=1,246 | GLP-1RA<br>N=845       | SGLT-2 Inhibitor<br>N=845 |
| Mean [IQR] follow-up, days     | 133 [73, 282]            | 136 [73, 365]              | 132 [71, 250]            | 134 [73, 309]           | 134 [73, 290]          | 156 [73, 362]             |
| Fracture                       |                          |                            |                          |                         |                        |                           |
| • No. of events                | 53                       | 58                         | 42                       | 53                      | 22                     | 25                        |
| • Incidence rate, per 1,000 PY | 57.3                     | 51.4                       | 52.8                     | 61.3                    | 39.9                   | 43.2                      |
| • Hazard ratio (95% CI)        | 1.06 (0.73-1.55)         | 1 (ref.)                   | 0.84 (0.56-1.26)         | 1 (ref.)                | 0.90 (0.51-1.59)       | 1 (ref.)                  |

Abbreviations: GLP-1RA, glucose-like peptide 1 receptor agonist; DPP-4 inhibitor, dipeptidyl peptidase-4 inhibitor; SGLT-2 inhibitor, sodium-glucose cotransporter-2 inhibitor; IQR, interquartile range; PY, person-years; CI, confidence interval

**Table S10.** Baseline Characteristics in Propensity Score-Matched Patients with Cirrhosis and Type 2 Diabetes Initiating GLP-1 Receptor Agonists or a Comparator Antidiabetic Medication, in the Optum Database\*

| Baseline Characteristic                             | Cohort 1<br>GLP-1RA vs. DPP-4 Inhibitor |                   | Cohort 2<br>GLP-1RA vs. Sulfonylurea |                         | Cohort 3<br>GLP-1RA vs. SGLT2 Inhibitor |                   |
|-----------------------------------------------------|-----------------------------------------|-------------------|--------------------------------------|-------------------------|-----------------------------------------|-------------------|
|                                                     | GLP-1RA<br>N=1,181                      | DPP-4i<br>N=1,181 | GLP-1RA<br>N=1,240                   | Sulfonylurea<br>N=1,240 | GLP-1RA<br>N=1,101                      | SGLT2i<br>N=1,101 |
| Male, %                                             | 54.7                                    | 55.1              | 55.4                                 | 53.6                    | 54.0                                    | 53.2              |
| Age, years - mean (SD)                              | 62.6 (9.8)                              | 62.7 (10.6)       | 62.3 (9.9)                           | 62.5 (10.5)             | 62.5 (9.9)                              | 62.7 (9.7)        |
| Race/ethnicity                                      | --                                      | --                | --                                   | --                      | --                                      | --                |
| • White                                             | 66.8                                    | 68.5              | 67.2                                 | 67.2                    | 65.8                                    | 66.3              |
| • Black                                             | 10.2                                    | 9.9               | 9.5                                  | 8.8                     | 10.4                                    | 9.8               |
| • Asian                                             | 1.9                                     | 1.7               | 2.1                                  | 2.3                     | 2.1                                     | 1.8               |
| • Hispanic                                          | 21.1                                    | 19.9              | 21.2                                 | 21.7                    | 21.7                                    | 22.1              |
| • Unknown                                           | 0                                       | 0                 | 0                                    | 0                       | 0                                       | 0                 |
| <u>Etiology of Cirrhosis</u>                        |                                         |                   |                                      |                         |                                         |                   |
| Viral Hepatitis                                     | 16.6                                    | 17.0              | 16.3                                 | 15.6                    | 15.3                                    | 15.5              |
| Alcoholic Liver Disease                             | 14.4                                    | 13.3              | 15.2                                 | 15.4                    | 13.8                                    | 14.6              |
| Nonalcoholic fatty liver disease                    | 49.0                                    | 46.6              | 50.8                                 | 49.8                    | 45.7                                    | 45.0              |
| Other / Unspecified                                 | 20.0                                    | 23.1              | 17.7                                 | 19.2                    | 25.2                                    | 24.9              |
| <u>Cirrhosis Severity</u>                           |                                         |                   |                                      |                         |                                         |                   |
| Hospitalization for any decompensation <sup>1</sup> | 7.5                                     | 7.8               | 7.2                                  | 7.0                     | 6.8                                     | 6.1               |
| Ascites / SBP                                       | 3.4                                     | 3.0               | 3.8                                  | 3.6                     | 3.7                                     | 3.9               |
| Hepatic encephalopathy                              | 5.0                                     | 4.7               | 4.6                                  | 4.9                     | 4.5                                     | 4.2               |
| Esophageal varices (any)                            | 3.3                                     | 2.7               | 3.0                                  | 3.2                     | 1.4                                     | 1.3               |
| Bleeding esophageal varices                         | 0                                       | 0                 | 0.2                                  | 0.1                     | 0                                       | 0                 |
| Hepatorenal syndrome                                | 0                                       | 0                 | 0.3                                  | 0.4                     | 0                                       | 0                 |
| Hepatocellular carcinoma                            | 3.0                                     | 3.0               | 3.1                                  | 2.7                     | 3.6                                     | 3.5               |
| <u>Diabetes Severity</u>                            |                                         |                   |                                      |                         |                                         |                   |
| Nephropathy                                         | 2.8                                     | 2.7               | 2.6                                  | 2.3                     | 1.2                                     | 1.3               |
| Neuropathy                                          | 6.7                                     | 6.7               | 6.7                                  | 6.9                     | 3.5                                     | 3.2               |
| Retinopathy                                         | 2.1                                     | 2.5               | 1.9                                  | 2.3                     | 1.4                                     | 1.2               |
| Circulatory complications                           | 1.3                                     | 1.4               | 1.2                                  | 1.5                     | 0.5                                     | 0.7               |
| Diabetic foot                                       | 1.0                                     | 1.0               | 0.8                                  | 0.9                     | 0.5                                     | 0.4               |
| Dorsopathies                                        | 8.6                                     | 8.4               | 8.1                                  | 9.0                     | 4.2                                     | 4.5               |
| Hypoglycemia                                        | 2.1                                     | 2.2               | 2.0                                  | 1.7                     | 1.0                                     | 1.3               |
| Skin & soft tissue infections                       | 3.2                                     | 3.6               | 2.6                                  | 2.7                     | 1.3                                     | 1.4               |
| Diabetes without complications                      | 26.3                                    | 23.7              | 27.8                                 | 26.4                    | 13.8                                    | 14.4              |
| <u>Diabetes drugs in prior 180 days</u>             |                                         |                   |                                      |                         |                                         |                   |
| Metformin                                           | 51.7                                    | 50.6              | 49.3                                 | 50.7                    | 55.6                                    | 55.7              |
| Glitazone                                           | 7.5                                     | 7.7               | 7.7                                  | 8.1                     | 4.8                                     | 5.3               |
| Insulin                                             | 24.5                                    | 23.7              | 27.1                                 | 25.9                    | 26.8                                    | 24.5              |
| SGLT2i                                              | 8.1                                     | 7.0               | 8.8                                  | 8.6                     | --                                      | --                |
| DPP-4i                                              | --                                      | --                | 16.7                                 | 17.4                    | 16.3                                    | 16.4              |
| Sulfonylurea                                        | 30.1                                    | 29.0              | --                                   | --                      | 28.1                                    | 28.4              |
| Meglitinides                                        | 1.0                                     | 1.0               | 1.2                                  | 1.2                     | 0.8                                     | 0.9               |
| <u>Comorbidities</u>                                |                                         |                   |                                      |                         |                                         |                   |
| Alcohol abuse / dependence                          | 3.5                                     | 3.8               | 3.7                                  | 3.7                     | 1.8                                     | 2.3               |
| Cancer <sup>2</sup>                                 | 6.4                                     | 6.1               | 6.5                                  | 5.3                     | 5.5                                     | 5.5               |

|                                                 |            |            |            |            |            |            |
|-------------------------------------------------|------------|------------|------------|------------|------------|------------|
| Drug abuse / dependence                         | 0.6        | 0.4        | 0.9        | 0.8        | 0.4        | 0.4        |
| Obesity                                         | 14.5       | 14.4       | 15.9       | 15.6       | 9.6        | 10.0       |
| Ever smoker                                     | 5.4        | 6.1        | 5.4        | 5.2        | 4.9        | 5.4        |
| Hypertension                                    | 21.1       | 19.6       | 40.0       | 41.5       | 11.6       | 11.7       |
| Dyslipidemia                                    | 19.1       | 19.4       | 14.7       | 16.2       | 9.0        | 8.9        |
| Ischemic heart disease                          | 4.9        | 4.4        | 4.1        | 3.6        | 2.0        | 2.2        |
| Congestive heart failure                        | 3.4        | 4.2        | 5.1        | 4.7        | 0.8        | 1.0        |
| Cardiac arrhythmia                              | 2.1        | 2.0        | 1.4        | 1.4        | 1.6        | 1.5        |
| Cerebrovascular disease                         | 1.2        | 1.3        | 2.2        | 2.2        | 0.5        | 0.5        |
| Obstructive Sleep Apnea                         | 4.4        | 4.5        | 3.6        | 4.0        | 2.3        | 2.1        |
| Chronic Obstructive Pulmonary disease           | 3.8        | 4.2        | 3.6        | 3.4        | 1.6        | 1.5        |
| Non-diabetes chronic kidney disease             | 3.3        | 3.1        | 5.1        | 4.7        | 1.0        | 1.1        |
| Depression                                      | 5.2        | 4.9        | 4.9        | 4.6        | 2.0        | 2.5        |
| Dementia                                        | 0.5        | 0.4        | 0.6        | 0.7        | 0.3        | 0.3        |
| Hypothyroidism                                  | 5.9        | 5.9        | 5.6        | 6.4        | 2.6        | 2.6        |
| Osteoporosis                                    | 3.3        | 2.4        | 4.2        | 3.9        | 3.1        | 2.7        |
| Falls                                           | 2.7        | 3.0        | 1.7        | 1.8        | 2.5        | 2.5        |
| Fractures                                       | 1.2        | 1.3        | 1.9        | 1.8        | 0.5        | 0.4        |
| Frailty <sup>2</sup>                            | 3.7        | 3.3        | 4.1        | 3.7        | 4.2        | 4.2        |
| <i>Medications</i>                              |            |            |            |            |            |            |
| Number of prescription medications, mean (SD)   | 12.7 (6.4) | 12.6 (6.6) | 12.7 (6.3) | 12.6 (6.7) | 13.0 (6.6) | 13.0 (6.7) |
| ACE inhibitors                                  | 35.8       | 35.2       | 34.4       | 35.5       | 35.2       | 35.5       |
| Angiotensin II receptor blockers                | 24.2       | 24.6       | 24.4       | 22.6       | 25.3       | 25.4       |
| Anti-arrhythmic medications                     | 2.1        | 2.0        | 1.0        | 1.2        | 1.0        | 1.4        |
| Anticoagulants                                  | 7.5        | 7.0        | 4.6        | 4.0        | 6.8        | 7.4        |
| Antiplatelets                                   | 9.5        | 9.4        | 6.1        | 5.9        | 9.6        | 9.9        |
| Beta blockers                                   | 35.8       | 37.0       | 35.3       | 36.2       | 33.6       | 36.2       |
| Bisphosphonates                                 | 2.5        | 2.0        | 2.6        | 2.7        | 2.5        | 2.4        |
| Calcium channel blockers                        | 20.9       | 21.7       | 20.4       | 20.8       | 21.3       | 20.8       |
| Other diuretics                                 | 20.2       | 20.5       | 20.3       | 20.7       | 21.2       | 20.5       |
| Loop diuretics                                  | 31.3       | 31.0       | 25.0       | 23.4       | 23.3       | 23.5       |
| Statins                                         | 47.6       | 47.3       | 49.6       | 49.5       | 50.4       | 50.4       |
| Non-statin lipid-lowering drugs                 | 9.7        | 9.2        | 9.8        | 10.2       | 10.3       | 9.6        |
| Antibiotics (any)                               | 54.4       | 55.3       | 51.5       | 52.5       | 39.4       | 40.8       |
| Antibiotics - fluoroquinolones                  | 20.5       | 20.5       | 18.6       | 19.3       | 17.1       | 17.7       |
| Anticonvulsants                                 | 28.7       | 28.3       | 29.4       | 30.7       | 28.2       | 28.1       |
| Antidepressants                                 | 41.2       | 39.7       | 36.8       | 38.5       | 39.4       | 40.8       |
| Benzodiazepines                                 | 17.1       | 16.3       | 17.3       | 17.7       | 16.2       | 15.7       |
| Barbiturates                                    | 2.5        | 2.2        | 2.5        | 2.7        | 2.4        | 2.5        |
| NSAIDs                                          | 16.2       | 15.9       | 17.3       | 17.9       | 17.9       | 17.0       |
| Opioids                                         | 43.6       | 44.7       | 42.8       | 42.7       | 38.7       | 39.1       |
| Rifaximin and/or Lactulose                      | 13.6       | 13.0       | 13.7       | 14.1       | 14.6       | 15.4       |
| <i>Healthcare Utilization in Prior 180 Days</i> |            |            |            |            |            |            |
| Any hospitalization                             | 20.1       | 20.6       | 19.0       | 17.3       | 23.9       | 23.5       |
| Any ED visit                                    | 37.1       | 37.9       | 39.5       | 38.6       | 40.4       | 39.8       |
| Any abdominal ultrasound                        | 44.7       | 44.7       | 44.0       | 42.7       | 44.4       | 44.1       |
| Any paracentesis                                | 1.0        | 1.2        | 0.9        | 1.3        | 1.1        | 1.0        |
| Any upper endoscopy                             | 5.0        | 5.2        | 3.8        | 4.0        | 1.7        | 2.0        |
| Any variceal banding                            | 2.1        | 2.3        | 2.0        | 2.2        | 0.5        | 0.5        |

|                                                |      |      |      |      |      |      |
|------------------------------------------------|------|------|------|------|------|------|
| Any blood transfusion                          | 6.2  | 6.6  | 6.1  | 5.7  | 5.3  | 5.4  |
| Any visit to endocrinologist                   | 21.2 | 22.5 | 23.0 | 21.6 | 20.7 | 21.8 |
| Any visit to gastroenterologist / hepatologist | 52.2 | 52.5 | 55.8 | 56.3 | 54.0 | 53.2 |
| <i>Preventative Care in Prior 180 Days</i>     |      |      |      |      |      |      |
| Receipt of pneumonia vaccine                   | 23.7 | 24.6 | 25.3 | 24.5 | 27.6 | 28.7 |
| Receipt of flu vaccine                         | 20.7 | 20.2 | 20.9 | 20.5 | 21.1 | 21.4 |
| Colonoscopy                                    | 10.9 | 12.3 | 12.8 | 12.2 | 12.4 | 10.9 |
| Mammogram                                      | 16.0 | 15.6 | 15.3 | 14.9 | 16.1 | 15.3 |
| PSA or DRE                                     | 12.4 | 13.1 | 11.3 | 12.1 | 11.8 | 13.1 |
| Any visit to primary care provider             | 84.4 | 84.0 | 83.9 | 84.0 | 84.7 | 84.4 |
| HbA1c test ordered                             | 84.6 | 83.5 | 84.4 | 85.4 | 86.7 | 86.6 |
| Lipid panel ordered                            | 67.1 | 65.3 | 65.6 | 66.9 | 67.1 | 67.3 |
| Liver function tests ordered                   | 34.7 | 33.8 | 36.1 | 34.4 | 35.6 | 35.5 |
| Microalbuminuria test ordered                  | 34.5 | 35.0 | 26.5 | 26.1 | 37.3 | 37.3 |

\*The study population derived from the Optum Clinformatics Dataset, as outlined in the Methods. All characteristics presented as %, or mean (standard deviation, SD) unless noted otherwise.

Abbreviations: GLP-1RA, glucose-like peptide 1 receptor agonist; DPP-4 inhibitor, dipeptidyl peptidase-4 inhibitor; SGLT-2 inhibitor, sodium-glucose cotransporter-2 inhibitor; SD, standard deviation; SBP, spontaneous bacterial peritonitis; ACE, angiotensin-converting enzyme; ARB, angiotensin II receptor blocker; NSAID, nonsteroidal anti-inflammatory drug; ED, emergency department; PSA, prostate-specific antigen; DRE, digital rectal examination; HbA1c, hemoglobin A1c).

<sup>1</sup>Hepatic decompensation events included any hospitalization for which primary cause included ascites, spontaneous bacterial peritonitis (SBP), hepatorenal syndrome, hepatic encephalopathy or bleeding esophageal varices. For details see Methods.

<sup>2</sup>Frailty was defined using the validated index by Kim DH et al<sup>1</sup>.

**Table S11.** Risk of Hepatic Decompensation Events in Propensity Score-Matched Patients with Cirrhosis and Type 2 Diabetes Initiating a GLP-1 Receptor Agonist versus Comparator Antidiabetic Medications, in the Optum Database\*

|                                            | Cohort 1 (n=1,181 pairs) |                            | Cohort 2 (n=1,240 pairs) |                         | Cohort 3 (n=1,101 pairs) |                             |
|--------------------------------------------|--------------------------|----------------------------|--------------------------|-------------------------|--------------------------|-----------------------------|
|                                            | GLP-1RA<br>N=1,181       | DPP-4 Inhibitor<br>N=1,181 | GLP-1RA<br>N=1,240       | Sulfonylurea<br>N=1,240 | GLP-1RA<br>N=1,101       | SGLT-2 Inhibitor<br>N=1,101 |
| Mean [IQR] follow-up, days                 | 127 [71, 249]            | 133 [73, 312]              | 127 [71, 249]            | 133 [73, 312]           | 133 [73, 268]            | 133 [73, 281]               |
| Hepatic Decompensation events <sup>1</sup> |                          |                            |                          |                         |                          |                             |
| • No. of events                            | 39                       | 70                         | 50                       | 91                      | 39                       | 44                          |
| • Incidence rate, per 1,000 PY             | 43.5                     | 71.0                       | 52.0                     | 76.5                    | 59.6                     | 55.3                        |
| • Hazard ratio (95% CI)                    | 0.72 (0.55-0.93)         | 1 (ref.)                   | 0.65 (0.46-0.92)         | 1 (ref.)                | 0.91 (0.59-1.40)         | 1 (ref.)                    |

Abbreviations: GLP-1RA, glucose-like peptide 1 receptor agonist; DPP-4 inhibitor, dipeptidyl peptidase-4 inhibitor; SGLT-2 inhibitor, sodium-glucose cotransporter-2 inhibitor; IQR, interquartile range; PY, person-years; CI, confidence interval

\*The study population derived from the Optum Clinformatics Dataset, as outlined in the Methods.

<sup>1</sup>Hepatic decompensation was defined as the first recorded hospitalization for which the primary cause included ascites, spontaneous bacterial peritonitis (SBP), hepatorenal syndrome, hepatic encephalopathy or bleeding esophageal varices.

**Tables S12A-B.** Rule-out approach sensitivity analysis for an unmeasured confounder

Scenario:

1. We fixed the observed relative risk (ARR) to the point estimate of the propensity score-matched hazard ratio for major decompensation events, comparing GLP-1RA initiators to DPP-4 initiators (hazard ratio, 0.68, 95% CI 0.53-0.88 [Table 2]).
2. We varied the prevalence of the unmeasured confounder ( $P_C$ ) from 0.1 to 0.6.
3. We then examined the parameter combinations of (a) the association between drug exposure and the confounder ( $OR_{EC}$ ), and (b) the association between the confounder and the primary outcome ( $RR_{CD}$ ), that would be necessary to move the point estimate of the association between GLP-1RA initiation and incident hepatic decompensation events to 1.0.

Definitions:

$OR_{EC}$ =Association between drug exposure and confounder  
 $RR_{CD}$ =Association between confounder and disease outcome  
 ARR=apparent exposure relative risk  
 $P_E$ =Prevalence of drug exposure  
 $P_C$ =Prevalence of the unmeasured confounder

Results and explanation:

**S12A.** An unmeasured confounder with a prevalence of 0.2 with a  $RR_{CD}$  of 0.6 for hepatic decompensation events would need to have an implausibly strong, positive association with GLP-1RA drug exposure ( $OR_{EC}=55.0$  or more) to move our point estimate to 1.0. If such a confounder had a more modest association with the drug exposure (i.e.  $OR_{EC}=3.95$ ), then it would also need to have a very strong, inverse association with hepatic decompensation outcomes (i.e.  $RR_{CD}=0.1$  or less), to move the point estimate to 1.0.

| $RR_{CD}$ | $P_C$ | $P_E$ | ARR  | $OR_{EC}$ |
|-----------|-------|-------|------|-----------|
| 0.97      | 0.2   | 0.02  | 0.68 | 83.34     |
| 0.95      | 0.2   | 0.02  | 0.68 | 999.0     |
| 0.9       | 0.2   | 0.02  | 0.68 | 999.0     |
| 0.85      | 0.2   | 0.02  | 0.68 | 999.0     |
| 0.8       | 0.2   | 0.02  | 0.68 | 999.0     |
| 0.75      | 0.2   | 0.02  | 0.68 | 999.0     |
| 0.7       | 0.2   | 0.02  | 0.68 | 999.0     |
| 0.65      | 0.2   | 0.02  | 0.68 | 999.0     |
| 0.6       | 0.2   | 0.02  | 0.68 | 55.00     |
| 0.55      | 0.2   | 0.02  | 0.68 | 22.54     |
| 0.5       | 0.2   | 0.02  | 0.68 | 14.27     |
| 0.45      | 0.2   | 0.02  | 0.68 | 10.50     |
| 0.4       | 0.2   | 0.02  | 0.68 | 8.35      |
| 0.35      | 0.2   | 0.02  | 0.68 | 6.97      |
| 0.3       | 0.2   | 0.02  | 0.68 | 6.00      |
| 0.25      | 0.2   | 0.02  | 0.68 | 5.28      |
| 0.2       | 0.2   | 0.02  | 0.68 | 4.73      |
| 0.15      | 0.2   | 0.02  | 0.68 | 4.30      |
| 0.1       | 0.2   | 0.02  | 0.68 | 3.95      |

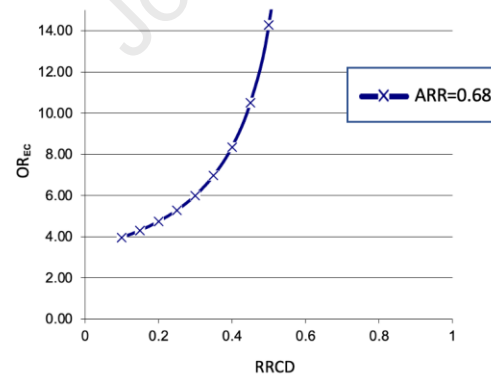



**S12B.** Alternatively, an unmeasured confounder with a prevalence of 0.6 and a weaker association with the drug exposure (i.e.  $OR_{EC}=2.16$ ) would need to have a very strong, inverse association with hepatic decompensation outcomes (i.e.  $RR_{CD}=0.1$  or less) to move the point estimate to 1.0.

| $RR_{CD}$ | $P_C$ | $P_E$ | ARR  | $OR_{EC}$ |
|-----------|-------|-------|------|-----------|
| 0.97      | 0.6   | 0.02  | 0.68 | 999.0     |
| 0.95      | 0.6   | 0.02  | 0.68 | 999.0     |
| 0.9       | 0.6   | 0.02  | 0.68 | 999.0     |
| 0.85      | 0.6   | 0.02  | 0.68 | 999.0     |
| 0.8       | 0.6   | 0.02  | 0.68 | 999.0     |
| 0.75      | 0.6   | 0.02  | 0.68 | 999.0     |
| 0.7       | 0.6   | 0.02  | 0.68 | 999.0     |
| 0.65      | 0.6   | 0.02  | 0.68 | 999.0     |
| 0.6       | 0.6   | 0.02  | 0.68 | 999.0     |
| 0.55      | 0.6   | 0.02  | 0.68 | 999.0     |
| 0.5       | 0.6   | 0.02  | 0.68 | 999.0     |
| 0.45      | 0.6   | 0.02  | 0.68 | 43.70     |
| 0.4       | 0.6   | 0.02  | 0.68 | 10.14     |
| 0.35      | 0.6   | 0.02  | 0.68 | 5.90      |
| 0.3       | 0.6   | 0.02  | 0.68 | 4.24      |
| 0.25      | 0.6   | 0.02  | 0.68 | 3.35      |
| 0.2       | 0.6   | 0.02  | 0.68 | 2.80      |
| 0.15      | 0.6   | 0.02  | 0.68 | 2.43      |
| 0.1       | 0.6   | 0.02  | 0.68 | 2.16      |

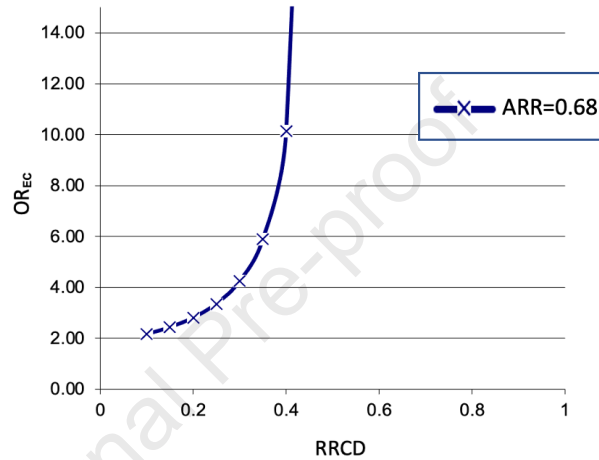



## Figure S1. Study Schema

The study design was an event-exposure based cohort study. The event was defined by at least 1 diagnosis of type 2 diabetes and at least 1 diagnosis of cirrhosis, defined using a validated ICD-9/ICD-10 algorithm (see Methods). The exposure was defined by new initiation of a second-line antidiabetic medication (in 3 pairwise comparisons), defined at the cohort entry date. The cohort entry date, in turn, was defined as the date on which the last requirement was fulfilled.

<sup>1</sup>Individuals were excluded with type 1 diabetes, gestational diabetes, end-stage renal failure or human immunodeficiency virus (HIV), as per the Methods. Up to a 45-day grace period was allowed for each medication.

<sup>2</sup>First recorded outcome of interest, switching/stopping study drugs, death, disenrollment or end of study period.

<sup>3</sup>Baseline covariates were defined during the 180-day covariate assessment window, prior to the cohort entry date.

---

**Supplementary References:**

1. Kim DH, Schneeweiss S, Glynn RJ, et al. Measuring Frailty in Medicare Data: Development and Validation of a Claims-Based Frailty Index. *J Gerontol A Biol Sci Med Sci* 2018;73(7):980-87. doi: 10.1093/gerona/glx229 [published Online First: 2017/12/16]

Journal Pre-proof

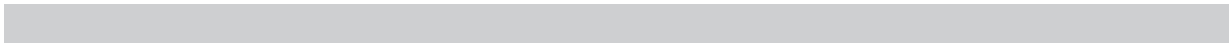

Journal Pre-proof
